# Supplementary material
Source: MDPI journal article supplement (https://www.mdpi.com/2304-6740/10/7/103)
Supplement: s1 [file s1]

# Controlling Chiral Self-Sorting in Truxene-Based Self-Assembled Cages

Amina Benchohra <sup>1</sup>, Simon Séjourné <sup>1</sup>, Antoine Labrunie <sup>1</sup>, Liam Miller <sup>1</sup>, Enzo Charbonneau <sup>1</sup>, Vincent Carré <sup>2</sup>, Frédéric Aubriet <sup>2</sup>, Magali Allain <sup>1</sup>, Marc Sallé <sup>1,\*</sup> and Sébastien Goeb <sup>1,\*</sup>

<sup>1</sup> Laboratoire MOLTECH-Anjou, UMR CNRS 6200, Université d'Angers, SFR MATRIX, 2 Bd Lavoisier, 49045 Angers, France; amina.benchohra@unige.ch (A.B.); simon.sejourne@etud.univ-angers.fr (S.S.); antoine.labrunie@u-paris.fr (A.L.); liam.miller@etu.univ-nantes.fr (L.M.); enzo.charbonneauenzo@etud.univ-angers.fr (E.C.); magali.allain@univ-angers.fr (M.A.)

<sup>2</sup> LCP-A2MC, FR 2843 Institut Jean Barriol de Chimie et Physique Moléculaires et Biomoléculaires, FR 3624 Réseau National de Spectrométrie de Masse FT-ICR à très haut champ, Université de Lorraine, ICPM, 1 Boulevard Arago, CEDEX 03, 57078 Metz, France; vincent.carre@univ-lorraine.fr (V.C.); frederic.aubriet@univ-lorraine.fr (F.A.)

\* Correspondence: marc.salle@univ-angers.fr (M.S.); sebastien.goeb@univ-angers.fr (S.G.)

|                                                                                                                                      |    |
|--------------------------------------------------------------------------------------------------------------------------------------|----|
| Figure S1. <sup>1</sup> H NMR spectrum of ligand <b>LEt</b> in CDCl <sub>3</sub> .....                                               | 2  |
| Figure S2. <sup>13</sup> C NMR spectrum of ligand <b>LEt</b> in CDCl <sub>3</sub> .....                                              | 2  |
| Figure S3. <sup>1</sup> H NMR spectrum of ligand <b>LBu</b> in CDCl <sub>3</sub> .....                                               | 3  |
| Figure S4. <sup>13</sup> C NMR spectrum of ligand <b>LBu</b> in CDCl <sub>3</sub> . ....                                             | 3  |
| Figure S5. <sup>1</sup> H NMR spectrum of <b>Ru</b> in MeOD.....                                                                     | 4  |
| Figure S6. <sup>1</sup> H NMR spectrum of <b>Rh</b> in MeOD.....                                                                     | 4  |
| Figure S7. <sup>1</sup> H NMR spectrum of <b>BuRu</b> in MeOD.....                                                                   | 5  |
| Figure S8. <sup>1</sup> H COSY NMR spectrum of <b>BuRu</b> in MeOD. ....                                                             | 5  |
| Figure S9. <sup>1</sup> H DOSY NMR spectrum of <b>BuRu</b> in MeOD.....                                                              | 6  |
| Figure S10. <sup>1</sup> H NMR spectrum of <b>EtRu</b> in MeOD (reaction time 4h).....                                               | 6  |
| Figure S11. <sup>1</sup> H NMR spectrum of <b>EtRu</b> in MeOD (reaction time 20h).....                                              | 7  |
| Figure S12. <sup>1</sup> H COSY NMR spectrum of <b>EtRu</b> in MeOD (reaction time 20h). ....                                        | 7  |
| Figure S13. <sup>1</sup> H DOSY NMR spectrum of <b>EtRu</b> in MeOD (reaction time 20h).....                                         | 8  |
| Figure S14. <sup>1</sup> H NMR spectrum of <b>BuRh</b> in MeOD.....                                                                  | 8  |
| Figure S15. <sup>1</sup> H COSY NMR spectrum of <b>BuRh</b> in MeOD. ....                                                            | 9  |
| Figure S16. <sup>1</sup> H DOSY NMR spectrum of <b>BuRh</b> in MeOD.....                                                             | 9  |
| Figure S17. ESI-FTICR HRMS spectrum of <b>BuRu</b> in MeOH at C = 10 <sup>-4</sup> M. ....                                           | 10 |
| Figure S18. ESI-FTICR HRMS spectrum of <b>EtRu</b> in MeOH at C = 10 <sup>-4</sup> M.....                                            | 10 |
| Figure S19. ESI-FTICR HRMS spectrum of <b>BuRh</b> in MeOH at C = 10 <sup>-4</sup> M. ....                                           | 11 |
| Figure S20. Representation of Bailar twist angles in <b>BuRu</b> (X-Ray) (a), <b>EtRu</b> (MM+) (b) and <b>BuRh</b> (X-Ray) (c)..... | 11 |

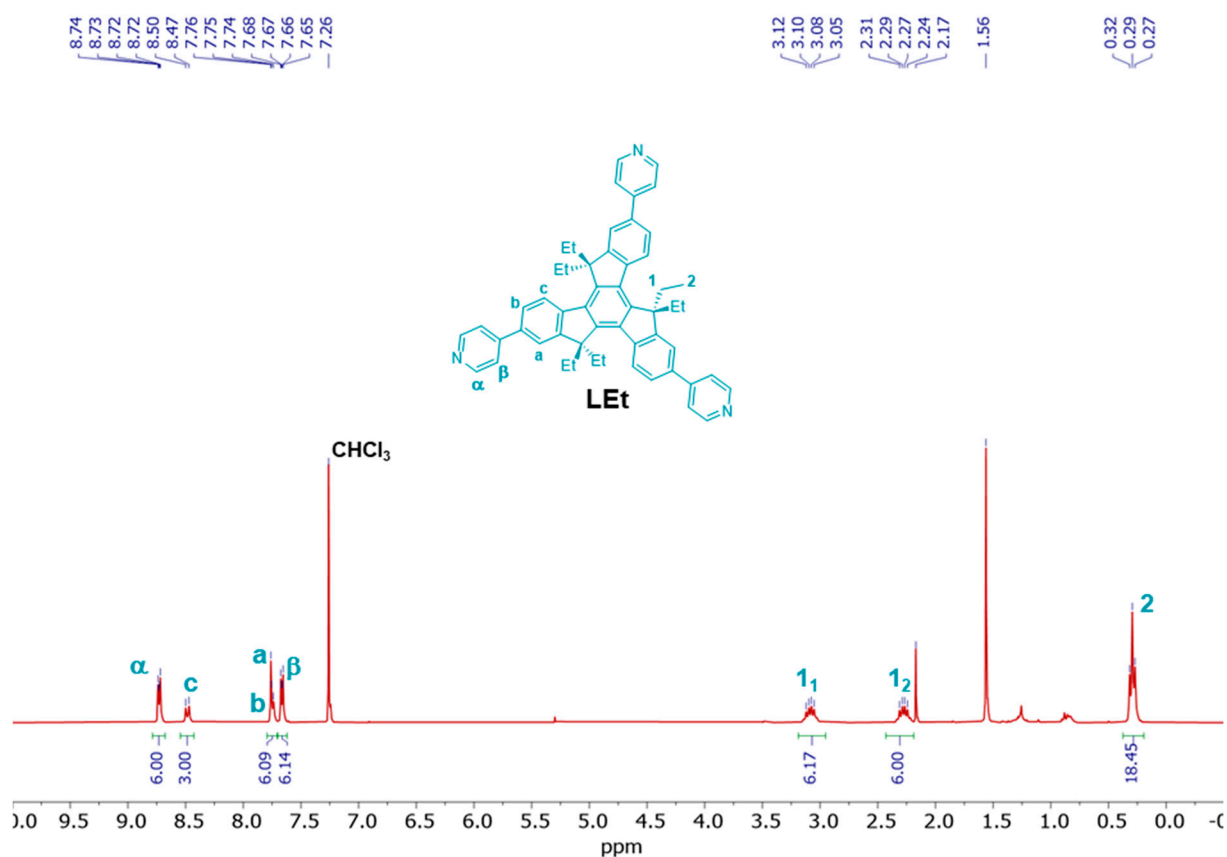

**Figure S1.** <sup>1</sup>H NMR spectrum of ligand **LEt** in CDCl<sub>3</sub>.

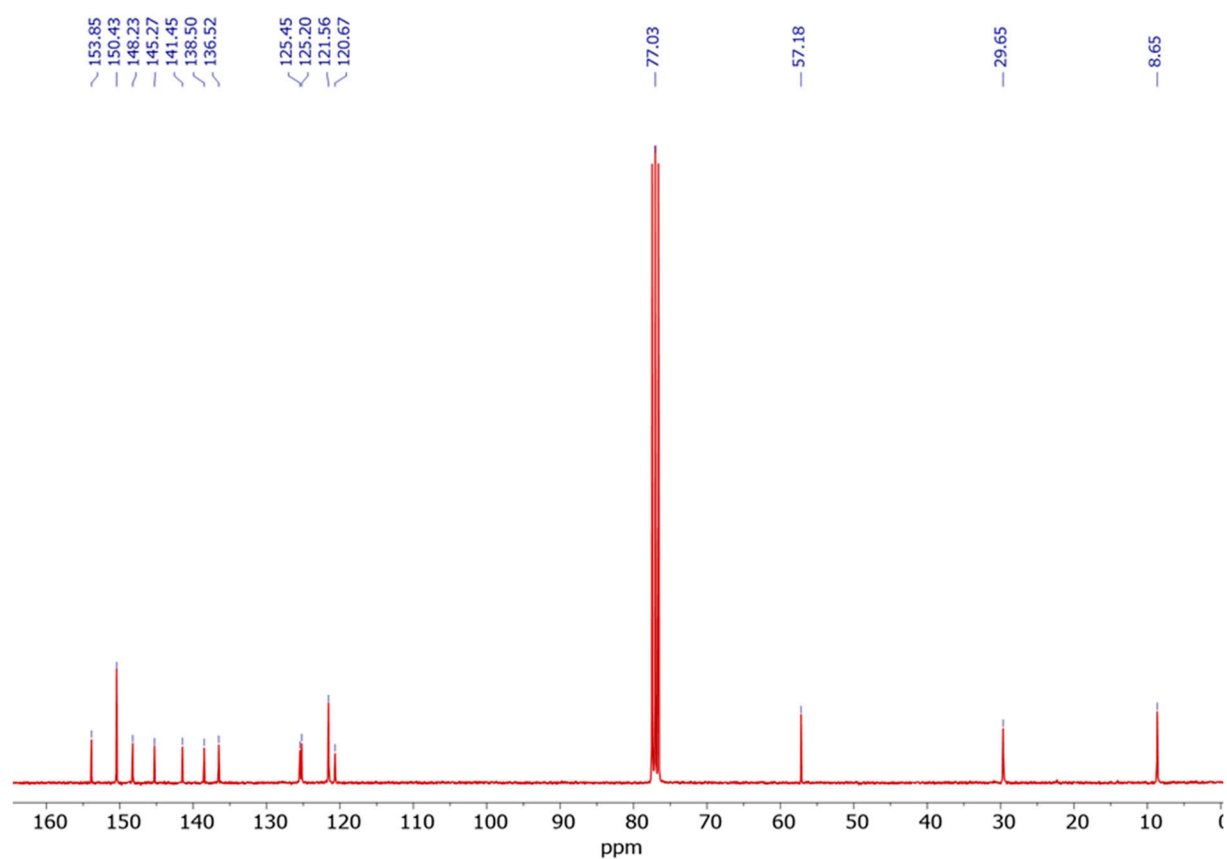

**Figure S2.** <sup>13</sup>C NMR spectrum of ligand **LEt** in CDCl<sub>3</sub>.

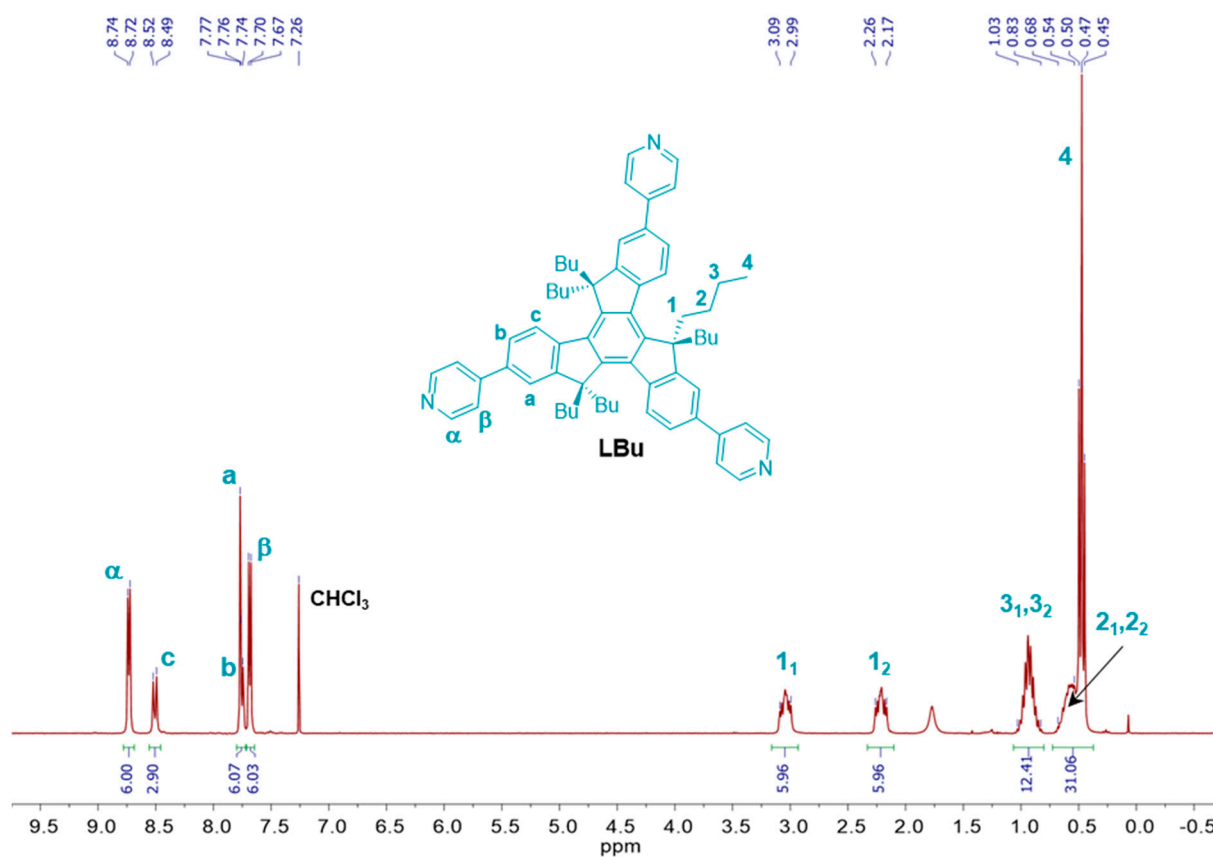

**Figure S3.** <sup>1</sup>H NMR spectrum of ligand **LBU** in CDCl<sub>3</sub>.

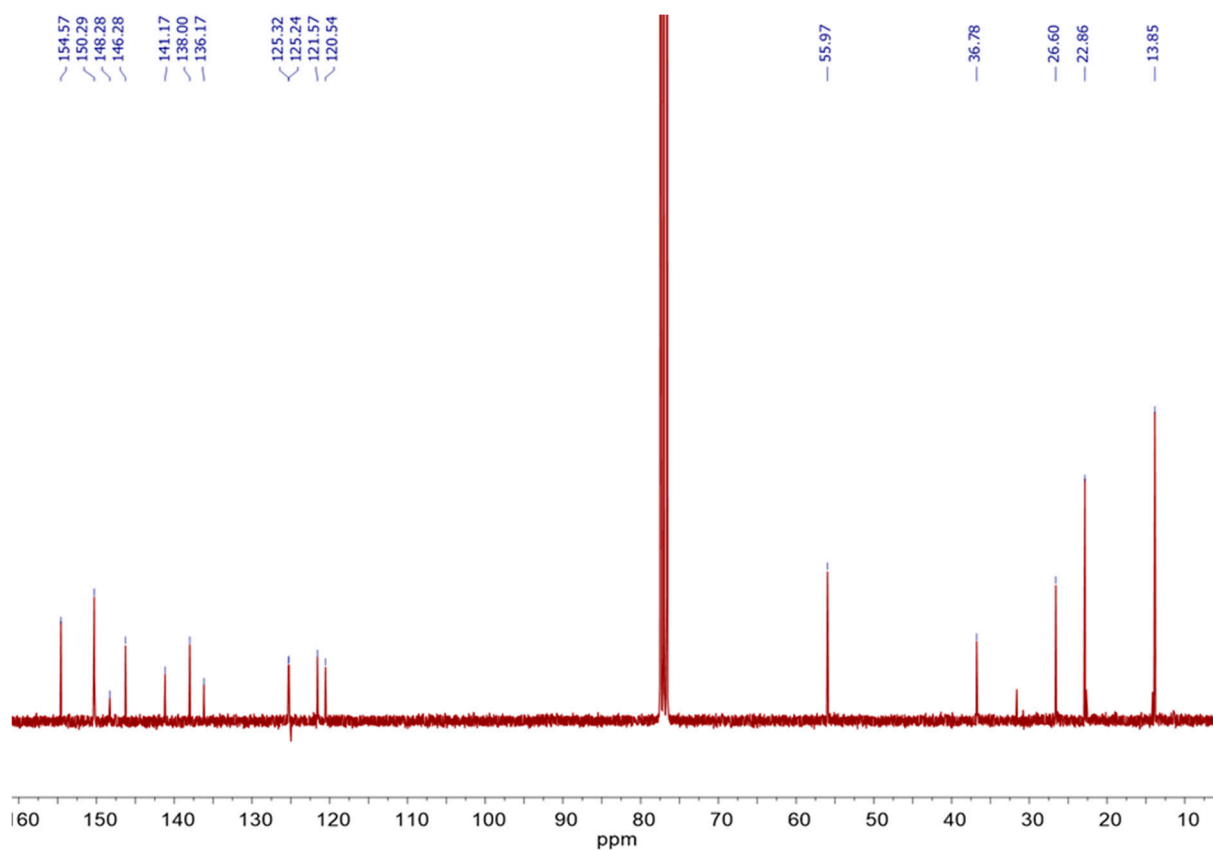

**Figure S4.** <sup>13</sup>C NMR spectrum of ligand **LBU** in CDCl<sub>3</sub>.

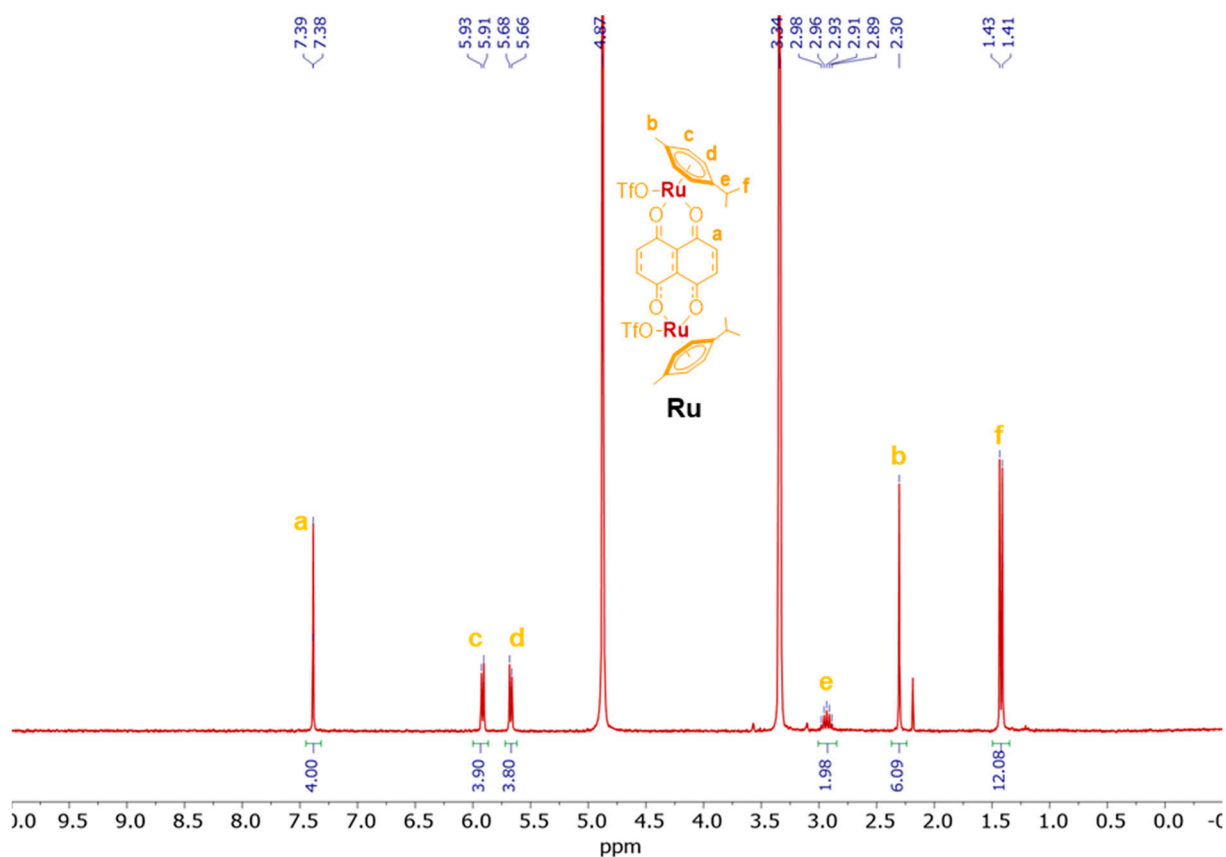

**Figure S5.**  $^1\text{H}$  NMR spectrum of **Ru** in MeOD.

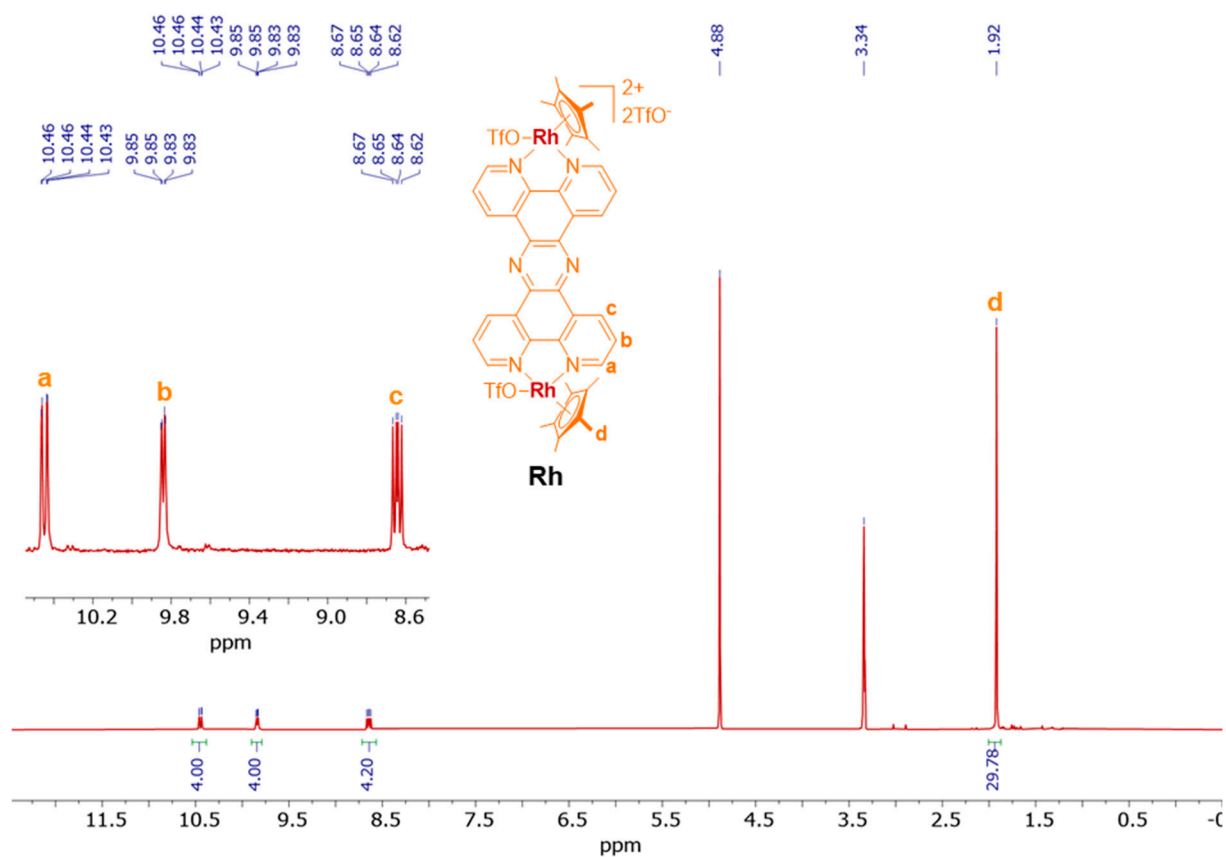

**Figure S6.**  $^1\text{H}$  NMR spectrum of **Rh** in MeOD.

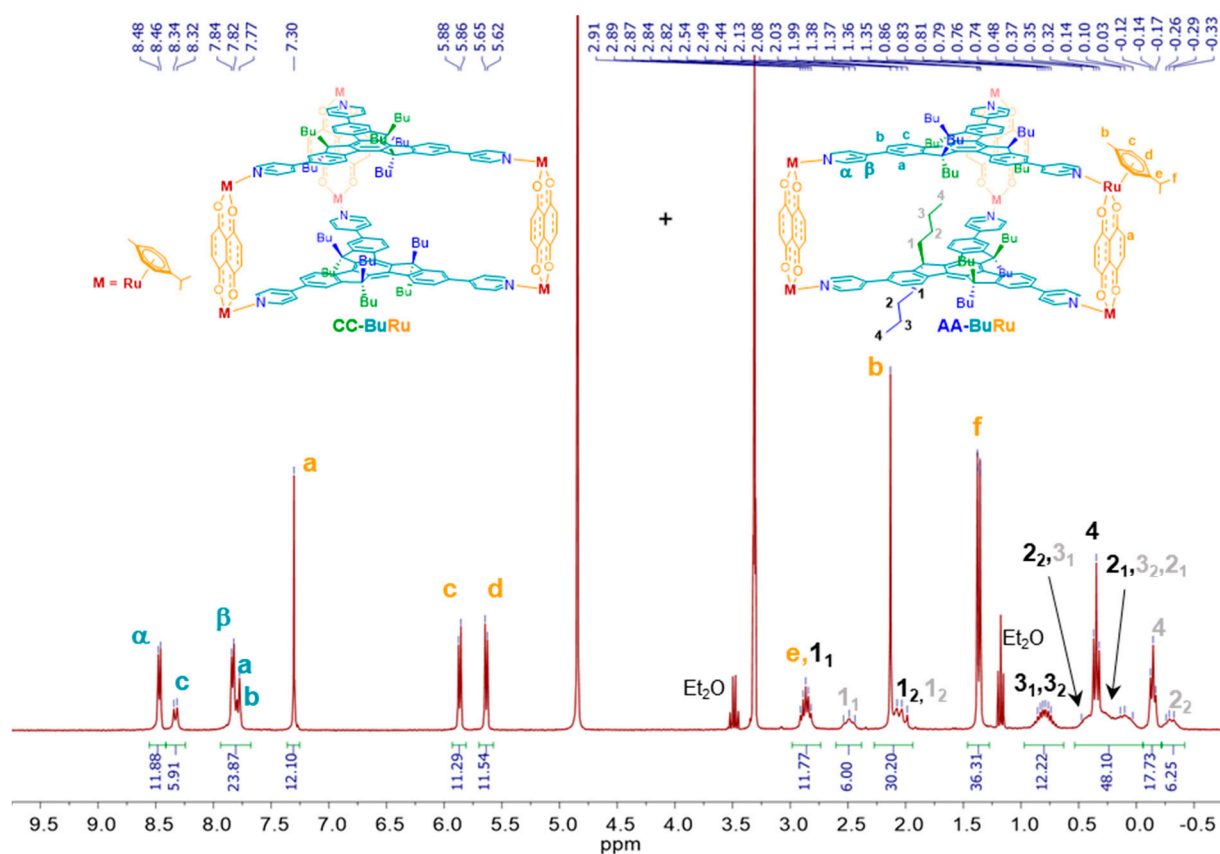

Figure S7.  $^1\text{H}$  NMR spectrum of **BuRu** in  $\text{MeOD}$ .

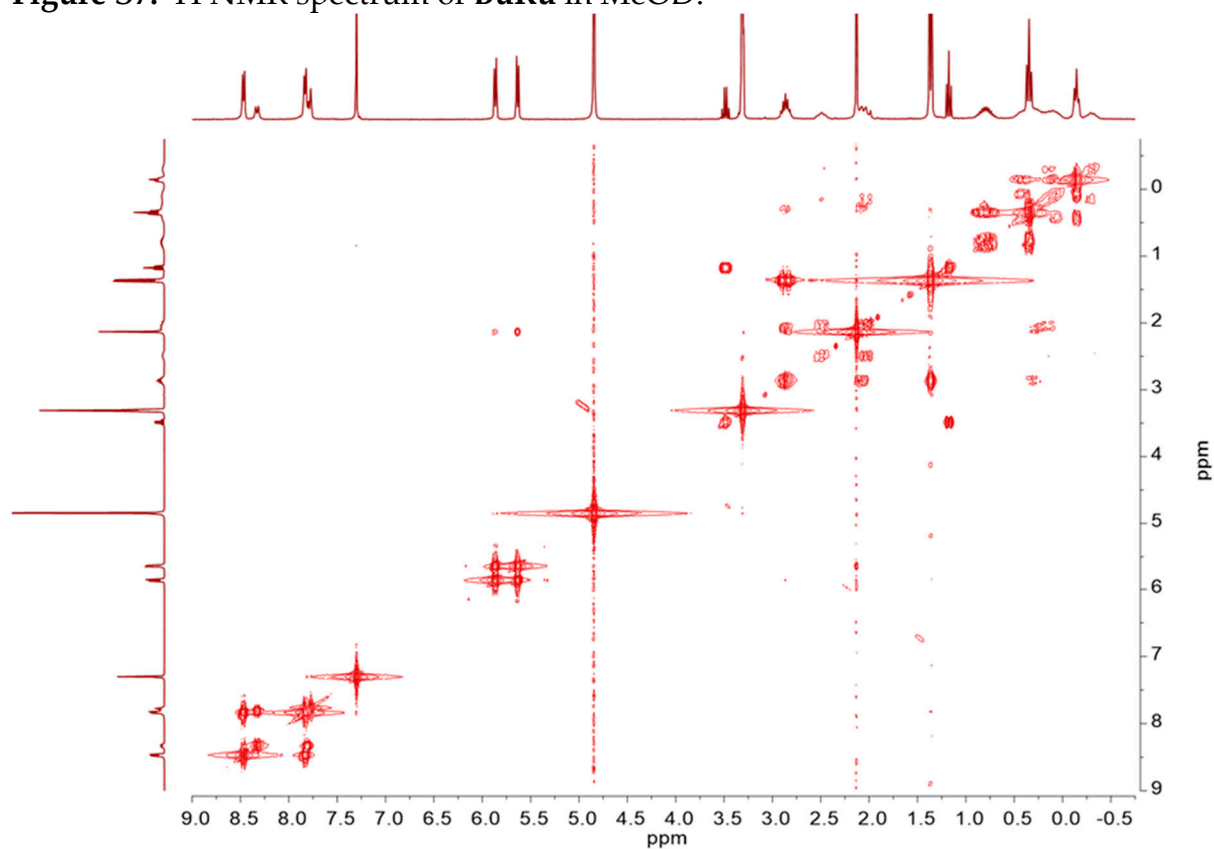

Figure S8.  $^1\text{H}$  COSY NMR spectrum of **BuRu** in  $\text{MeOD}$ .

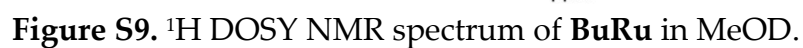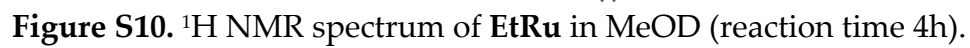

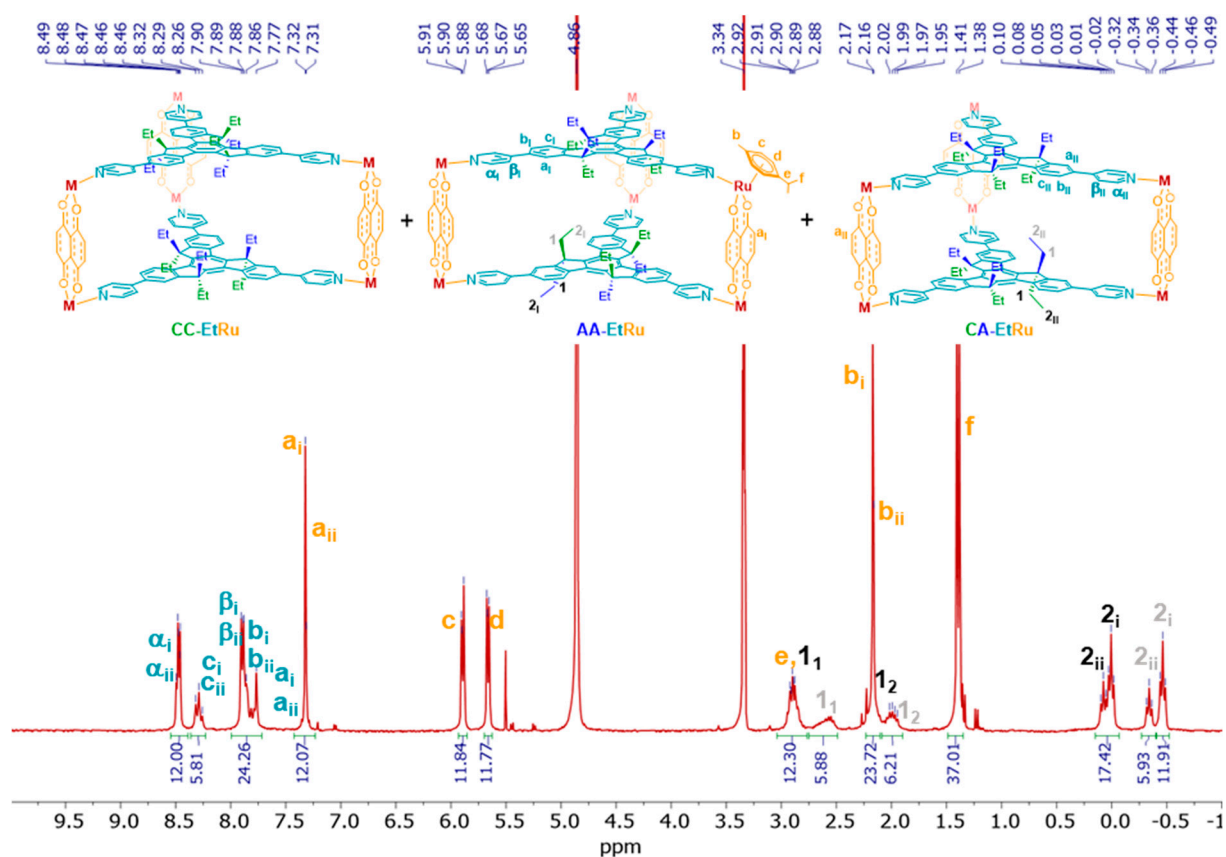

**Figure S11.** <sup>1</sup>H NMR spectrum of EtRu in MeOD (reaction time 20h).

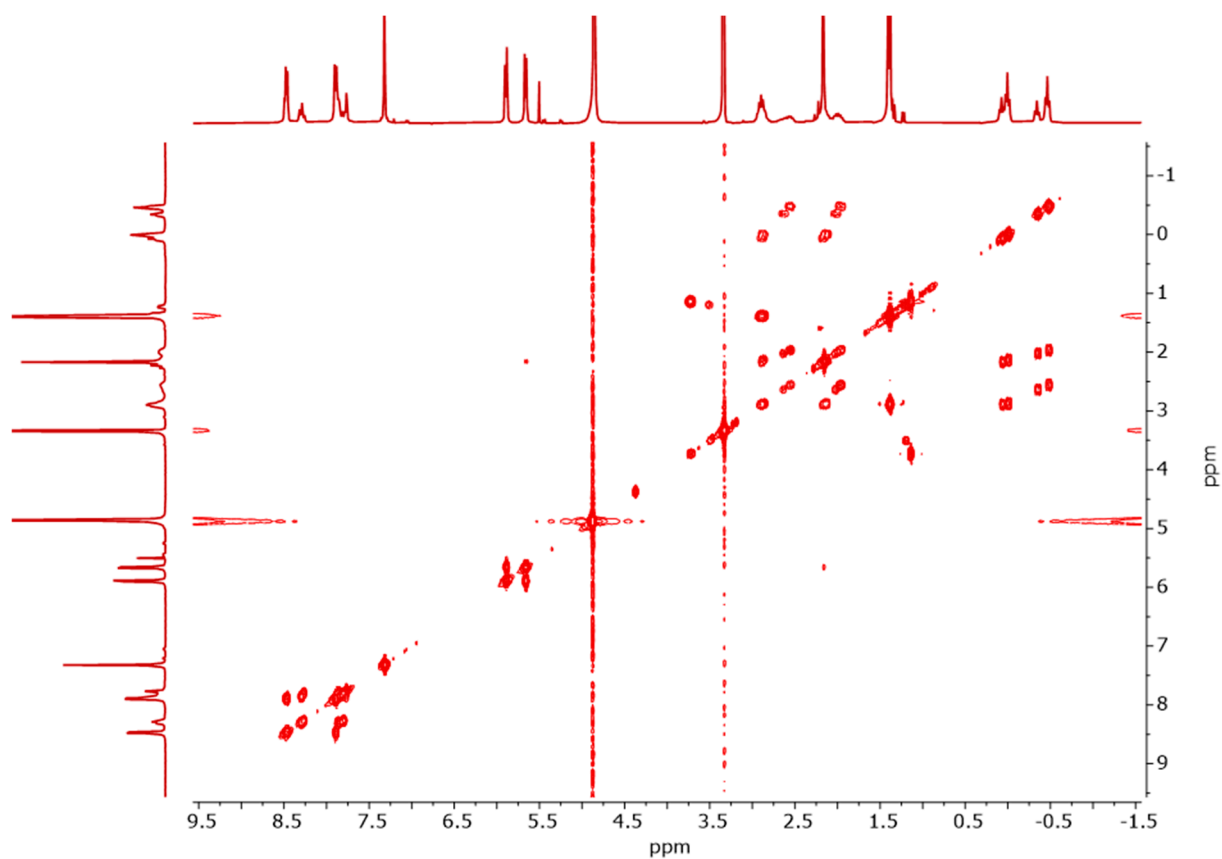

**Figure S12.** <sup>1</sup>H COSY NMR spectrum of EtRu in MeOD (reaction time 20h).

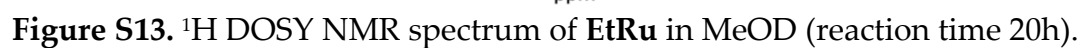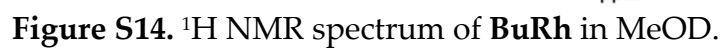



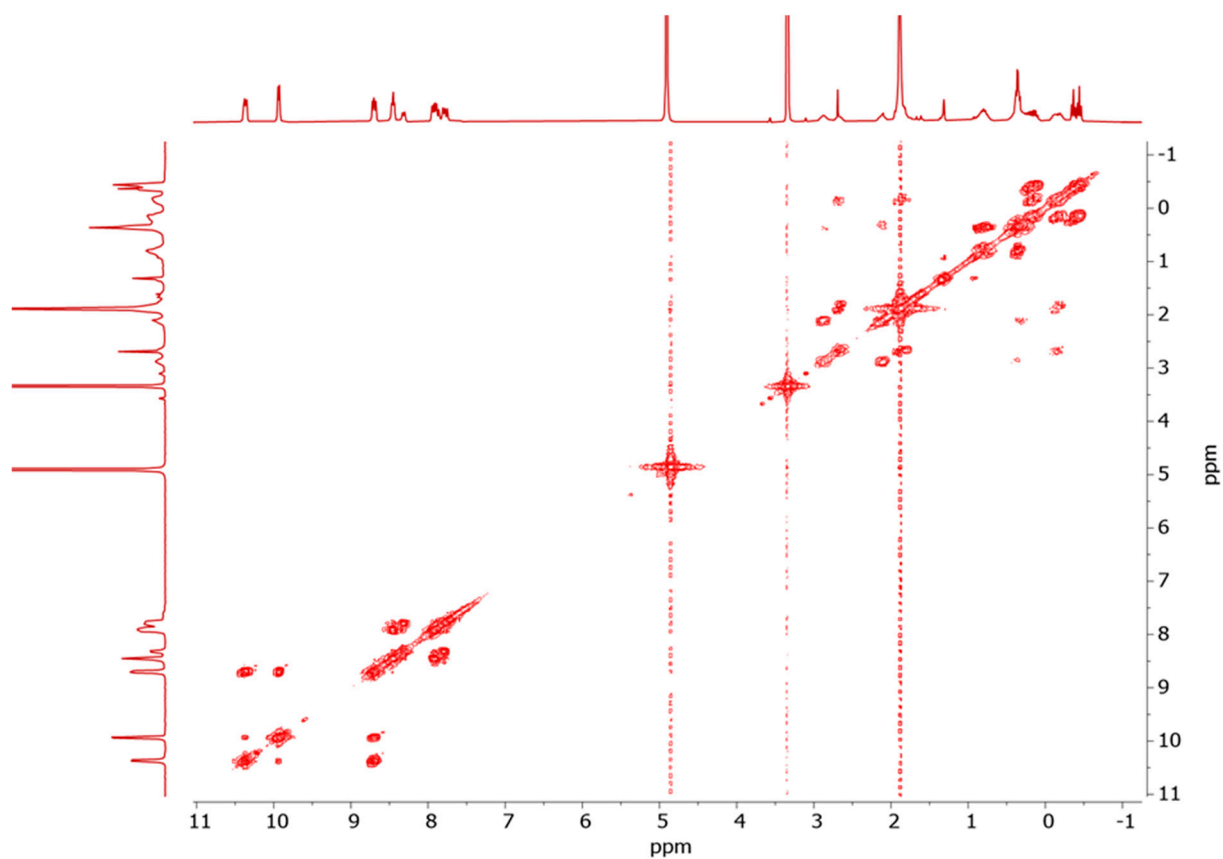

**Figure S15.**  $^1\text{H}$  COSY NMR spectrum of **BuRh** in MeOD.

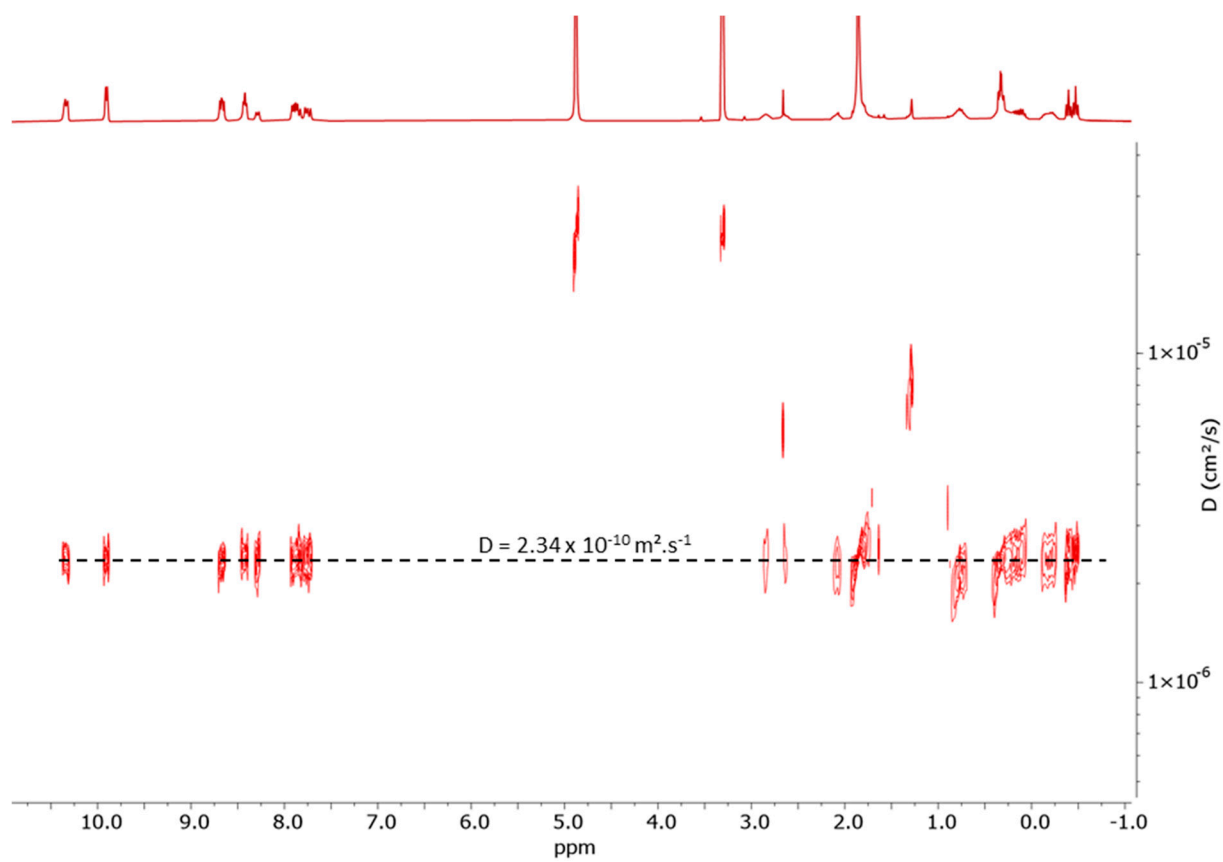

**Figure S16.**  $^1\text{H}$  DOSY NMR spectrum of **BuRh** in MeOD.

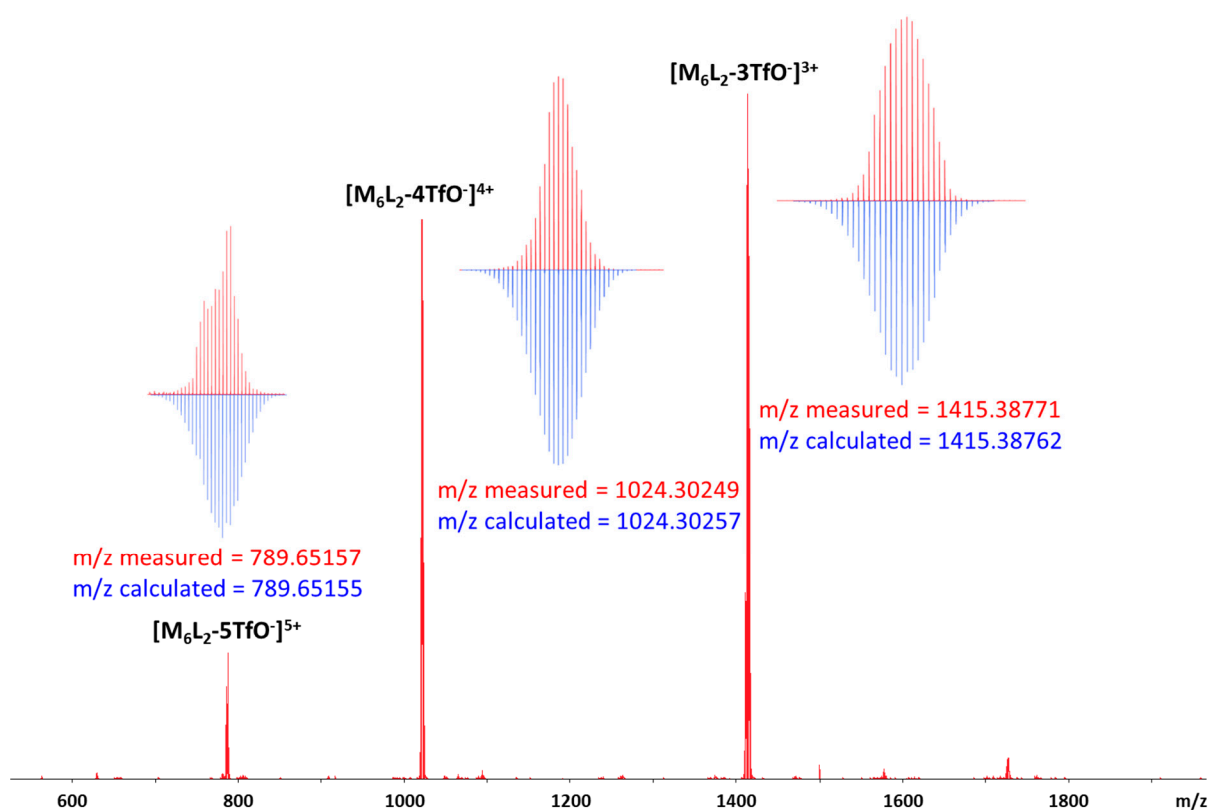

**Figure S17.** ESI-FTICR HRMS spectrum of **BuRu** in MeOH at  $C = 10^{-4}$  M.

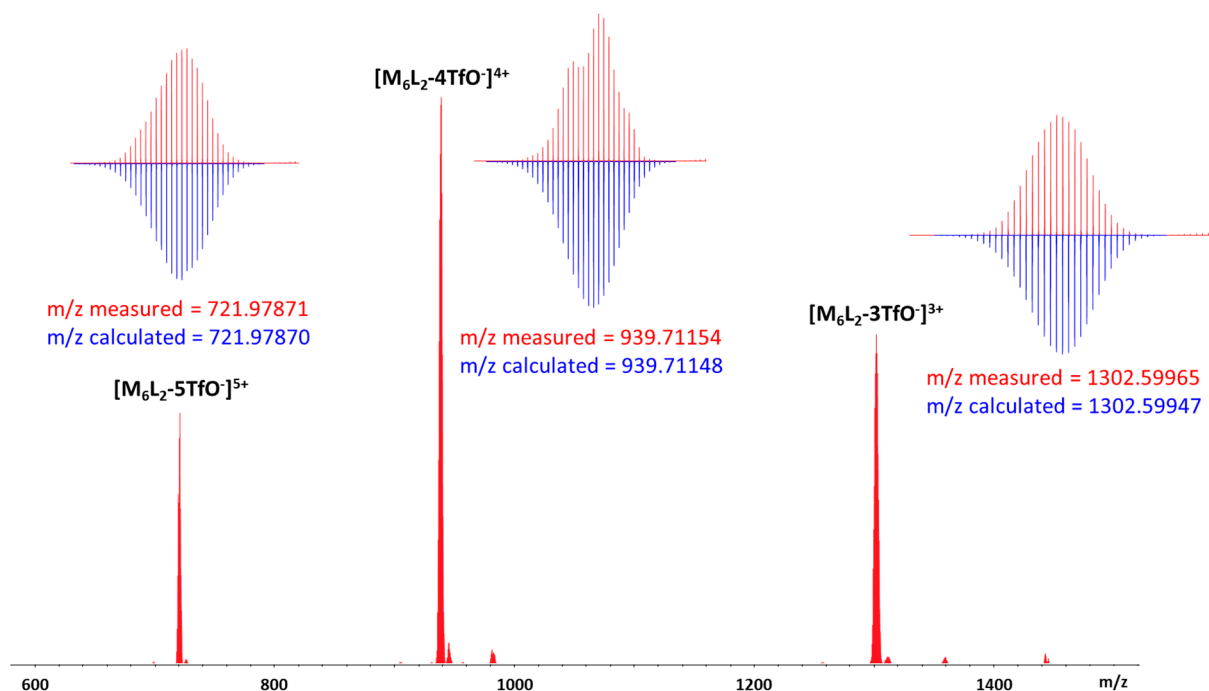

**Figure S18.** ESI-FTICR HRMS spectrum of **EtRu** in MeOH at  $C = 10^{-4}$  M.

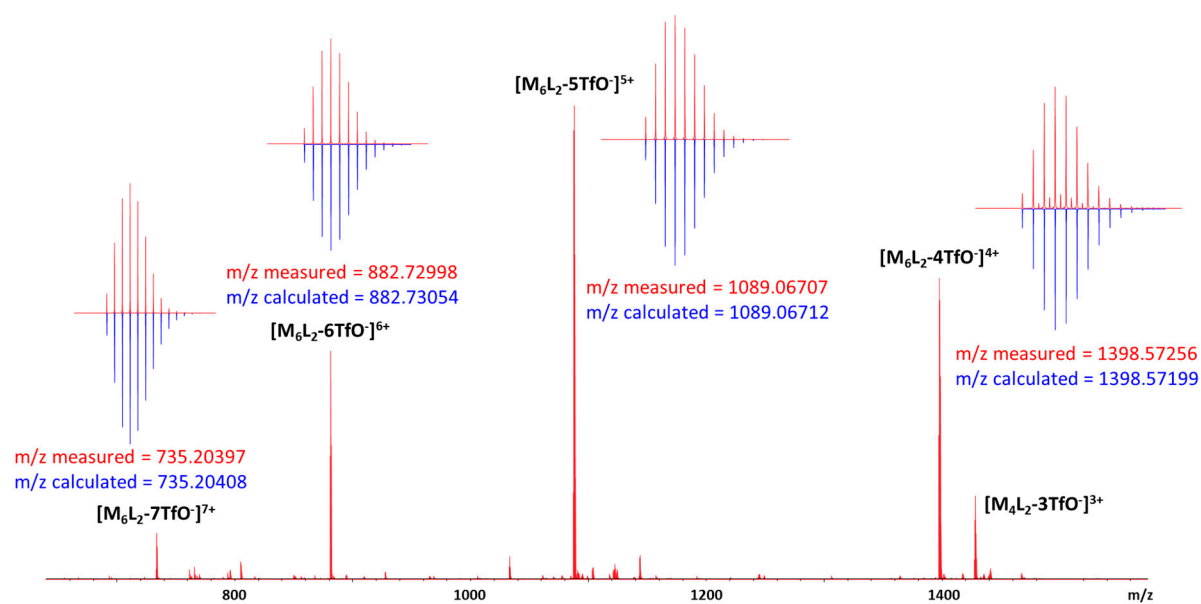

**Figure S19.** ESI-FTICR HRMS spectrum of **BuRh** in MeOH at  $C = 10^{-4}$  M.

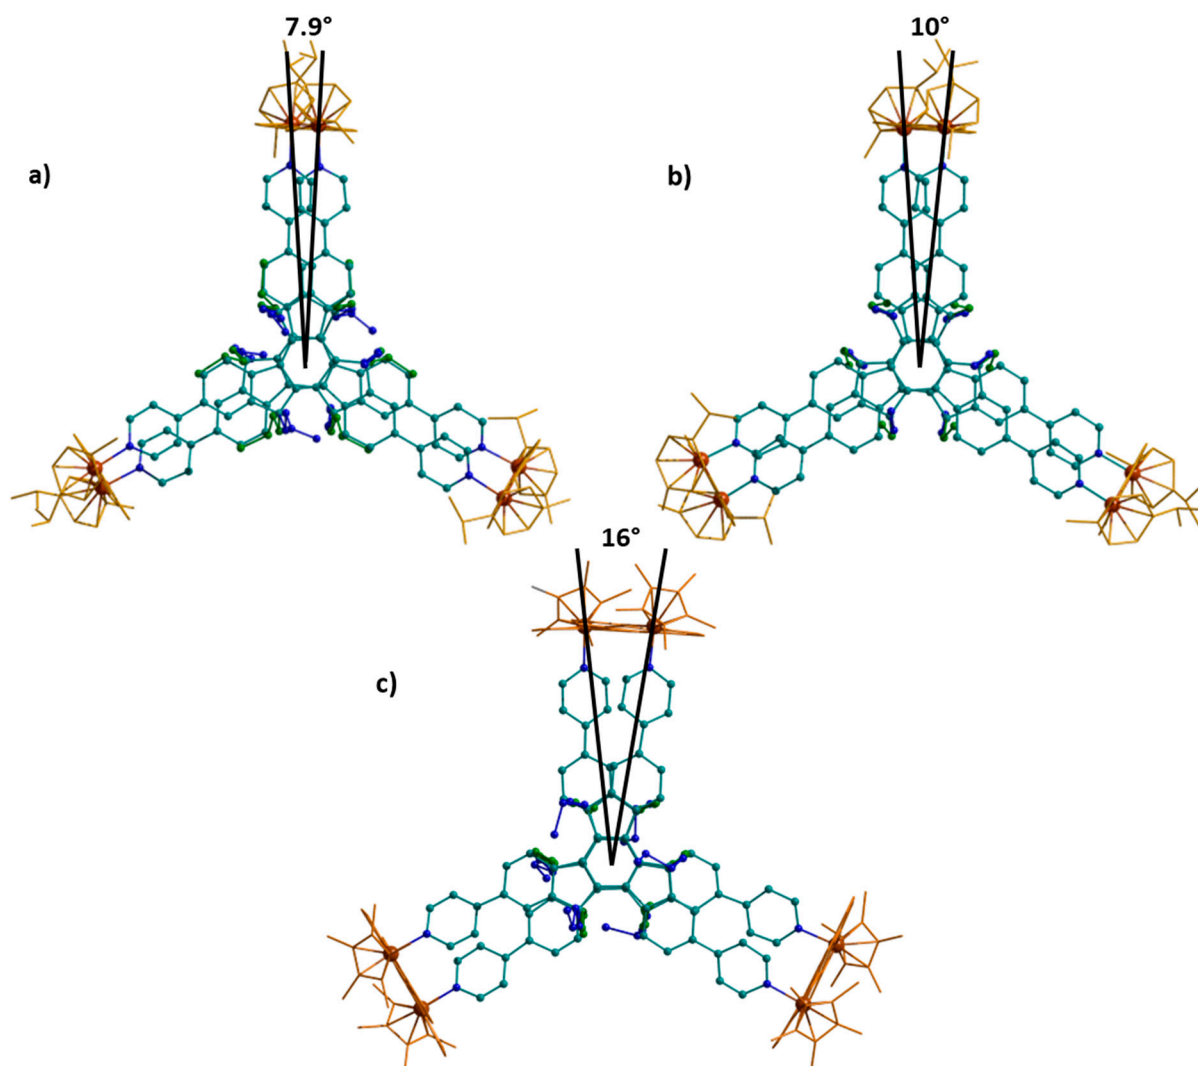

**Figure S20.** Representation of Bailar twist angles in **BuRu** (X-Ray) (a), **EtRu** (MM+) (b) and **BuRh** (X-Ray) (c).
